# Supplementary material
Source: MDPI journal article supplement (https://www.mdpi.com/1424-2818/12/5/191)
Supplement: s1 [file s1]

**Table S1: : Species list of the four glacier forelands studied**
