# Supplementary material
Source: MDPI journal article supplement (https://www.mdpi.com/1424-2818/12/5/191)
Supplement: s1 [file s1]

Table S3: Seriation table of widespread vascular plant species present in all four glacier forelands.

| species                        | JTF_A  | JTF_B  | JTF_C  | JTF_D  | JTF_E  | JTF_F  | JTF_G  | JTF_H  | JTF_I  | SBF_A  | SBF_B  | SBF_C  | SBF_D  | SBF_E  | SBF_F  | SBF_G  | SBF_H  | SBF_I  | SBF_J  | LSF_A  | LSF_B  | LSF_C  | LSF_D  | LSF_E  | LSF_F  | LSFG   | LSF_H  | LSF_I  | GBK_A  | GBK_B  | GBK_C  | GBK_D  | GBK_E  | GBK_F  | GBK_G  | GBK_H  |        |
|--------------------------------|--------|--------|--------|--------|--------|--------|--------|--------|--------|--------|--------|--------|--------|--------|--------|--------|--------|--------|--------|--------|--------|--------|--------|--------|--------|--------|--------|--------|--------|--------|--------|--------|--------|--------|--------|--------|--------|
| Epilobium anagallidifolium     | 0.2467 | 0.0270 | 0.0097 | 0.0220 | 0.0000 | 0.0000 | 0.0000 | 0.0000 | 0.0000 | 0.0000 | 0.0000 | 0.0000 | 0.0000 | 0.0000 | 0.0000 | 0.0807 | 0.0000 | 0.0000 | 0.0000 | 0.0000 | 0.0000 | 0.0000 | 0.0000 | 0.0000 | 0.0037 | 0.0000 | 0.0000 | 0.0000 | 0.0000 | 0.0037 | 0.0353 | 0.0457 | 0.0000 | 0.0087 | 0.0033 | 0.0000 |        |
| Geum reptans                   | 0.0007 | 0.1710 | 0.0407 | 0.0833 | 0.0917 | 0.6303 | 0.0000 | 0.0000 | 0.0000 | 0.0113 | 0.0043 | 0.0263 | 0.3257 | 0.1320 | 0.0530 | 0.2400 | 0.0000 | 0.0000 | 0.0000 | 0.0000 | 0.0033 | 0.5283 | 0.8433 | 0.7383 | 2.8433 | 0.0867 | 0.1833 | 0.0167 | 0.0000 | 0.0000 | 0.0700 | 0.1117 | 0.0383 | 0.0000 | 0.1533 | 0.0000 |        |
| Cerastium uniflorum            | 0.0057 | 0.7050 | 0.3240 | 0.5867 | 0.0323 | 0.0433 | 0.0000 | 0.0000 | 0.0000 | 0.1140 | 0.1297 | 0.4490 | 1.4700 | 0.2287 | 0.6740 | 0.0533 | 0.0167 | 0.0000 | 0.0000 | 0.0000 | 0.0167 | 0.7767 | 0.8900 | 0.0207 | 1.2333 | 0.0100 | 0.0000 | 0.0000 | 0.0010 | 0.0480 | 0.3467 | 0.4567 | 0.9843 | 0.0067 | 0.6917 | 0.0000 |        |
| Veronica alpina                | 0.0017 | 0.0133 | 0.0453 | 0.0107 | 0.0010 | 0.0153 | 0.0000 | 0.0000 | 0.0000 | 0.0000 | 0.0000 | 0.0000 | 0.0003 | 0.0250 | 0.0557 | 0.1947 | 0.0000 | 0.0013 | 0.0000 | 0.0000 | 0.0000 | 0.0440 | 0.1367 | 0.2343 | 0.2883 | 0.0203 | 0.0833 | 0.0000 | 0.0000 | 0.0003 | 0.0390 | 0.1887 | 0.2867 | 0.1567 | 0.7737 | 0.0067 |        |
| Poa laxa                       | 0.0070 | 0.5023 | 0.1123 | 0.7333 | 0.5200 | 0.3883 | 0.4113 | 0.4167 | 0.0000 | 0.0720 | 0.0893 | 0.1490 | 0.2357 | 0.0000 | 0.0000 | 0.0067 | 1.4000 | 0.0000 | 0.0000 | 0.0000 | 0.0007 | 0.6340 | 0.5250 | 0.2100 | 0.8333 | 1.1333 | 0.1533 | 0.0567 | 0.0010 | 0.0530 | 0.3757 | 0.2183 | 0.0653 | 0.0433 | 0.0833 | 0.0000 |        |
| Sagina saginoides              | 0.0087 | 0.1477 | 0.0017 | 0.0000 | 0.0017 | 0.0003 | 0.0000 | 0.0000 | 0.0000 | 0.0050 | 0.0130 | 0.0243 | 0.0337 | 0.0440 | 0.0043 | 0.1333 | 0.0940 | 0.0283 | 0.0000 | 0.0000 | 0.0017 | 0.0670 | 0.0367 | 0.0193 | 0.0653 | 0.0010 | 0.0000 | 0.0000 | 0.0000 | 0.0133 | 0.1277 | 0.0820 | 0.1200 | 0.0053 | 0.0517 | 0.0003 |        |
| Saxifraga bryoides             | 0.0017 | 0.2057 | 0.8517 | 2.8933 | 2.2603 | 0.5383 | 0.3513 | 0.0273 | 0.0133 | 0.0017 | 0.0133 | 0.1110 | 0.2547 | 0.7780 | 1.6897 | 1.4683 | 0.4967 | 0.1500 | 0.1173 | 0.0000 | 0.0040 | 1.3933 | 3.8167 | 1.0283 | 8.5333 | 0.8267 | 1.4200 | 0.4650 | 0.0003 | 0.0160 | 0.0753 | 0.7267 | 2.0593 | 0.2267 | 8.5000 | 0.0467 |        |
| Sedum alpestre                 | 0.0073 | 0.0050 | 0.0243 | 0.0417 | 0.0087 | 0.0143 | 0.0030 | 0.0123 | 0.0000 | 0.0033 | 0.0010 | 0.0023 | 0.0027 | 0.0157 | 0.1497 | 0.0783 | 0.0190 | 0.0010 | 0.0000 | 0.0000 | 0.0000 | 0.0287 | 0.0000 | 0.0000 | 0.0827 | 0.0047 | 0.0033 | 0.0000 | 0.0000 | 0.0003 | 0.0047 | 0.0017 | 0.0013 | 0.0023 | 0.1203 | 0.0210 |        |
| Gnaphalium supinum             | 0.0063 | 0.0070 | 0.0530 | 0.0323 | 0.0013 | 0.0323 | 0.0027 | 0.0000 | 0.0037 | 0.0000 | 0.0000 | 0.0000 | 0.0000 | 0.0280 | 0.1230 | 0.4667 | 0.0067 | 0.0300 | 0.0033 | 0.0000 | 0.0000 | 0.0040 | 0.0107 | 0.1283 | 0.1143 | 0.0643 | 0.0220 | 0.0050 | 0.0000 | 0.0000 | 0.0010 | 0.0023 | 0.0023 | 0.2630 | 0.3363 | 0.4507 |        |
| Leucanthemopsis alpina         | 0.0000 | 0.1180 | 0.4547 | 1.5307 | 0.1140 | 0.8893 | 0.1160 | 0.0087 | 0.0133 | 0.0380 | 0.0150 | 0.0210 | 0.0460 | 0.1283 | 0.8767 | 0.5833 | 0.3583 | 0.0740 | 0.0667 | 0.0000 | 0.0000 | 0.0783 | 0.3783 | 0.4233 | 0.3533 | 0.1587 | 0.2483 | 0.1300 | 0.0000 | 0.0067 | 0.0177 | 0.0270 | 1.1513 | 0.2397 | 0.1700 | 0.4617 |        |
| Cardamine resedifolia          | 0.0000 | 0.0003 | 0.0153 | 0.0317 | 0.0007 | 0.0027 | 0.0007 | 0.0013 | 0.0003 | 0.0000 | 0.0000 | 0.0033 | 0.0000 | 0.0020 | 0.0230 | 0.0210 | 0.0040 | 0.0007 | 0.0000 | 0.0000 | 0.0000 | 0.0067 | 0.0010 | 0.0007 | 0.0117 | 0.0003 | 0.0030 | 0.0000 | 0.0000 | 0.0010 | 0.0000 | 0.0000 | 0.0000 | 0.0007 | 0.0017 | 0.0033 |        |
| Oxyria digyna                  | 0.0000 | 0.0067 | 0.0000 | 0.0833 | 0.0017 | 0.0073 | 0.0000 | 0.0000 | 0.0000 | 0.0037 | 0.0033 | 0.0263 | 0.0667 | 0.0230 | 0.0507 | 0.0217 | 0.0000 | 0.0000 | 0.0000 | 0.0000 | 0.0140 | 0.1090 | 0.1293 | 0.1217 | 0.4700 | 0.0033 | 0.0200 | 0.0000 | 0.0000 | 0.0107 | 0.0263 | 0.5283 | 0.3973 | 0.2910 | 0.0867 | 0.0000 |        |
| Arabis alpina ssp. alpina      | 0.0000 | 0.0077 | 0.0000 | 0.0020 | 0.0000 | 0.0000 | 0.0000 | 0.0000 | 0.0000 | 0.0133 | 0.0133 | 0.1557 | 0.0200 | 0.0010 | 0.0000 | 0.0000 | 0.0000 | 0.0000 | 0.0000 | 0.0000 | 0.0100 | 0.0140 | 0.0210 | 0.0000 | 0.0067 | 0.0000 | 0.0000 | 0.0000 | 0.0000 | 0.0010 | 0.0137 | 0.0057 | 0.0057 | 0.0000 | 0.0100 | 0.0000 |        |
| Poa alpina                     | 0.0000 | 0.0000 | 0.0170 | 0.0000 | 0.0000 | 0.2123 | 0.0000 | 0.0000 | 0.0000 | 0.0633 | 0.0387 | 0.1370 | 0.0833 | 0.8967 | 2.0733 | 1.8167 | 4.0167 | 1.5233 | 0.0000 | 0.0000 | 0.0000 | 0.0567 | 0.1967 | 0.4733 | 1.3633 | 1.4667 | 0.0867 | 0.0567 | 0.0000 | 0.0033 | 0.0170 | 0.5167 | 0.9067 | 1.4500 | 6.9500 | 1.7333 |        |
| Salix herbacea                 | 0.0000 | 0.0133 | 0.0000 | 0.0000 | 0.8353 | 2.3140 | 1.0333 | 0.0067 | 0.1430 | 0.0000 | 0.0000 | 0.0000 | 0.0000 | 0.0190 | 0.1110 | 2.9767 | 1.1167 | 0.7933 | 1.3933 | 0.0000 | 0.0000 | 0.0533 | 0.4267 | 4.8933 | 0.4533 | 10.700 | 7.1500 | 8.2467 | 0.0000 | 0.0000 | 0.0000 | 0.0000 | 0.1167 | 9.2903 | 1.8500 | 8.2033 |        |
| Salix retusa                   | 0.0000 | 0.0167 | 0.0183 | 0.0000 | 2.6100 | 1.5173 | 3.0333 | 0.1333 | 0.2600 | 0.0007 | 0.0000 | 0.0033 | 0.0000 | 0.0000 | 0.0000 | 0.1433 | 0.0000 | 0.0033 | 0.0000 | 0.0000 | 0.0000 | 0.0037 | 0.0850 | 0.7233 | 1.2167 | 4.3000 | 0.3733 | 3.6833 | 0.0000 | 0.0000 | 0.0000 | 0.0003 | 0.0000 | 0.0007 | 7.7433 | 4.5333 | 0.4000 |
| Saxifraga exarata ssp. exarata | 0.0000 | 0.0017 | 0.0000 | 0.0167 | 0.0000 | 0.0000 | 0.0000 | 0.0000 | 0.0000 | 0.0000 | 0.0040 | 0.0000 | 0.0017 | 0.0000 | 0.0000 | 0.0000 | 0.0000 | 0.0000 | 0.0000 | 0.0000 | 0.0000 | 0.0067 | 0.0033 | 0.0000 | 0.0000 | 0.0000 | 0.0000 | 0.0000 | 0.0000 | 0.0000 | 0.0000 | 0.0003 | 0.0003 | 0.0000 | 0.0000 | 0.0000 |        |
| Silene acaulis ssp. exscapa    | 0.0000 | 0.0067 | 0.0000 | 0.0000 | 0.0167 | 0.0000 | 0.0000 | 0.0000 | 0.0000 | 0.0003 | 0.0003 | 0.0020 | 0.0000 | 0.0000 | 0.4867 | 0.2600 | 0.1200 | 0.0000 | 0.0000 | 0.0000 | 0.0000 | 0.0500 | 0.0000 | 0.0000 | 2.1500 | 2.3950 | 0.9500 | 0.0333 | 0.0000 | 0.0000 | 0.0000 | 0.0167 | 0.0667 | 0.0167 | 2.3367 | 0.5350 |        |
| Leontodon hispidus             | 0.0000 | 0.0000 | 0.0333 | 0.0457 | 0.0370 | 0.0350 | 0.0850 | 3.2233 | 1.8123 | 0.0000 | 0.0000 | 0.0000 | 0.0000 | 0.0000 | 0.0000 | 0.3250 | 5.2833 | 6.1500 | 0.5833 | 0.0000 | 0.0000 | 0.0000 | 0.0033 | 0.0267 | 0.1507 | 0.0703 | 2.5400 | 1.9433 | 0.0000 | 0.0000 | 0.0000 | 0.0000 | 0.0000 | 0.0000 | 4.1833 | 3.0900 |        |
| Campanula scheuchzeri          | 0.0000 | 0.0000 | 0.0000 | 0.0400 | 0.0003 | 0.0000 | 0.0683 | 0.0000 | 0.0150 | 0.0000 | 0.0000 | 0.0000 | 0.0000 | 0.0000 | 0.0000 | 0.0767 | 1.4483 | 0.1183 | 0.0017 | 0.0000 | 0.0000 | 0.0000 | 0.0000 | 0.0000 | 0.0067 | 0.0000 | 0.2067 | 0.0550 | 0.0000 | 0.0000 | 0.0000 | 0.0000 | 0.0000 | 0.0533 | 0.2867 |        |        |
| Luzula alpinoplosa             | 0.0000 | 0.0000 | 0.0000 | 0.0000 | 0.0500 | 1.5000 | 1.3950 | 0.2167 | 0.0000 | 0.0000 | 0.0000 | 0.0000 | 0.0000 | 0.0000 | 0.0000 | 0.0333 | 0.8733 | 0.0000 | 0.0000 | 0.0000 | 0.0000 | 0.0500 | 0.0000 | 0.0000 | 0.4667 | 0.1233 | 0.1000 | 0.0317 | 0.0000 | 0.0000 | 0.0000 | 0.0000 | 0.1000 | 0.2167 | 0.2067 | 5.8500 |        |
| Euphrasia minima               | 0.0000 | 0.0000 | 0.0000 | 0.0000 | 0.0203 | 0.0003 | 0.2633 | 0.0850 | 0.0177 | 0.0000 | 0.0000 | 0.0000 | 0.0000 | 0.0000 | 0.0000 | 0.5423 | 0.4540 | 0.1147 | 0.1637 | 0.0000 | 0.0000 | 0.0000 | 0.0000 | 0.0943 | 0.1860 | 0.0590 | 0.1743 | 0.1317 | 0.0000 | 0.0000 | 0.0000 | 0.0000 | 0.0000 | 0.1887 | 0.1733 | 0.2347 |        |
| Homogyne alpina                | 0.0000 | 0.0000 | 0.0000 | 0.0000 | 0.0067 | 0.0000 | 0.0003 | 0.0120 | 0.1203 | 0.0000 | 0.0000 | 0.0000 | 0.0000 | 0.0000 | 0.0000 | 0.0017 | 0.0000 | 0.6067 | 0.0000 | 0.0000 | 0.0000 | 0.0000 | 0.0000 | 0.0100 | 0.0100 | 0.0067 | 0.1967 | 0.8733 | 0.0000 | 0.0000 | 0.0000 | 0.0000 | 0.0083 | 0.2433 | 0.9417 |        |        |
| Hieracium c.f. alpinum         | 0.0000 | 0.0000 | 0.0000 | 0.0000 | 0.0013 | 0.0013 | 0.0367 | 0.1563 | 0.1590 | 0.0000 | 0.0000 | 0.0000 | 0.0000 | 0.0000 | 0.0000 | 0.0067 | 0.0067 | 0.0000 | 0.0000 | 0.0000 | 0.0000 | 0.0000 | 0.0000 | 0.0000 | 0.0000 | 0.0017 | 0.0000 | 0.0000 | 0.0000 | 0.0000 | 0.0013 | 0.0077 | 0.0000 | 0.0000 | 0.0000 | 0.0200 |        |
| Cirsium spinosissimum          | 0.0000 | 0.0000 | 0.0000 | 0.0000 | 0.0000 | 0.2447 | 0.0000 | 0.0500 | 0.0000 | 0.0000 | 0.0000 | 0.0000 | 0.0000 | 0.0000 | 0.0000 | 1.0007 | 1.8000 | 0.9933 | 0.0000 | 0.0000 | 0.0000 | 0.0000 | 0.0000 | 0.0000 | 0.1837 | 0.0000 | 0.3333 | 1.8000 | 0.0000 | 0.0000 | 0.0000 | 0.0000 | 0.0000 | 0.0000 | 0.4367 | 0.0867 |        |
| Gentiana nivalis               | 0.0000 | 0.0000 | 0.0000 | 0.0000 | 0.0000 | 0.0000 | 0.0000 | 0.0050 | 0.0000 | 0.0000 | 0.0000 | 0.0000 | 0.0000 | 0.0000 | 0.0000 | 0.0000 | 0.3267 | 0.0173 | 0.0000 | 0.0000 | 0.0000 | 0.0000 | 0.0000 | 0.0000 | 0.0000 | 0.0117 | 0.0683 | 0.0317 | 0.0000 | 0.0000 | 0.0000 | 0.0000 | 0.0000 | 0.0000 | 0.0000 | 0.0067 |        |
| Carex curvula ssp. curvula     | 0.0000 | 0.0000 | 0.0000 | 0.0000 | 0.0000 | 0.0000 | 0.0000 | 0.0000 | 0.0050 | 0.0000 | 0.0000 | 0.0000 | 0.0000 | 0.0000 | 0.0000 | 0.0000 | 0.0167 | 0.0000 | 0.0000 | 0.0000 | 0.0000 | 0.0000 | 0.0000 | 0.0000 | 0.0000 | 0.0833 | 0.0600 | 0.3667 | 0.0000 | 0.0000 | 0.0000 | 0.0000 | 0.0000 | 0.2167 | 2.8833 |        |        |
| Phyteuma hemisphaericum        | 0.0000 | 0.0000 | 0.0000 | 0.0000 | 0.0000 | 0.0000 | 0.0000 | 0.0000 | 0.0010 | 0.0000 | 0.0000 | 0.0000 | 0.0000 | 0.0000 | 0.0000 | 0.0000 | 0.0517 | 0.0000 | 0.0117 | 0.0000 | 0.0000 | 0.0000 | 0.0000 | 0.0067 | 0.0400 | 0.0000 | 0.0600 | 0.0783 | 0.0000 | 0.0000 | 0.0000 | 0.0000 | 0.0000 | 0.0000 | 0.0000 | 0.0667 |        |
