# Supplementary material
Source: MDPI journal article supplement (https://www.mdpi.com/1424-2818/12/5/191)
Supplement: s1 [file s1]

Table S2: Correlation matrix of explanatory variables used in the PCA analysis in Figure 7; high correlations ( $> \pm 0.5$  ) are printed bold.

|                        |                                |                  |                               |                     |             |             |              |              |               |             |              |              |           |                      |                           |                       |                |                 |              |                       |
|------------------------|--------------------------------|------------------|-------------------------------|---------------------|-------------|-------------|--------------|--------------|---------------|-------------|--------------|--------------|-----------|----------------------|---------------------------|-----------------------|----------------|-----------------|--------------|-----------------------|
| elevation              | <b>-0,69</b>                   |                  |                               |                     |             |             |              |              |               |             |              |              |           |                      |                           |                       |                |                 |              |                       |
| number vascular plants | <b>0,85</b>                    | <b>-0,52</b>     |                               |                     |             |             |              |              |               |             |              |              |           |                      |                           |                       |                |                 |              |                       |
| ground cover           | <b>0,92</b>                    | <b>-0,66</b>     | <b>0,85</b>                   |                     |             |             |              |              |               |             |              |              |           |                      |                           |                       |                |                 |              |                       |
| Ch                     | <b>0,73</b>                    | -0,50            | <b>0,62</b>                   | <b>0,59</b>         |             |             |              |              |               |             |              |              |           |                      |                           |                       |                |                 |              |                       |
| G                      | 0,27                           | -0,12            | 0,41                          | 0,46                | -0,07       |             |              |              |               |             |              |              |           |                      |                           |                       |                |                 |              |                       |
| Hgram                  | <b>0,66</b>                    | -0,35            | <b>0,66</b>                   | <b>0,69</b>         | 0,38        | 0,30        |              |              |               |             |              |              |           |                      |                           |                       |                |                 |              |                       |
| Hherb                  | <b>0,63</b>                    | -0,36            | <b>0,71</b>                   | <b>0,75</b>         | 0,22        | <b>0,64</b> | <b>0,78</b>  |              |               |             |              |              |           |                      |                           |                       |                |                 |              |                       |
| lichen                 | 0,42                           | -0,35            | 0,16                          | 0,29                | 0,30        | 0,00        | -0,01        | 0,03         |               |             |              |              |           |                      |                           |                       |                |                 |              |                       |
| MacP                   | 0,56                           | -0,49            | 0,34                          | 0,46                | 0,28        | -0,02       | 0,05         | 0,12         | <b>0,51</b>   |             |              |              |           |                      |                           |                       |                |                 |              |                       |
| moss                   | <b>0,63</b>                    | <b>-0,61</b>     | 0,47                          | <b>0,65</b>         | 0,18        | 0,09        | 0,25         | 0,36         | 0,28          | <b>0,55</b> |              |              |           |                      |                           |                       |                |                 |              |                       |
| NaPh                   | <b>0,66</b>                    | <b>-0,57</b>     | <b>0,59</b>                   | <b>0,82</b>         | 0,23        | 0,47        | 0,25         | 0,46         | 0,30          | <b>0,51</b> | <b>0,77</b>  |              |           |                      |                           |                       |                |                 |              |                       |
| Th                     | <b>0,52</b>                    | -0,18            | <b>0,60</b>                   | <b>0,54</b>         | 0,24        | 0,21        | <b>0,67</b>  | <b>0,74</b>  | 0,16          | 0,07        | 0,28         | 0,26         |           |                      |                           |                       |                |                 |              |                       |
| soil aeration          | <b>-0,69</b>                   | <b>0,53</b>      | -0,47                         | <b>-0,71</b>        | -0,42       | -0,22       | -0,41        | -0,39        | -0,33         | -0,43       | <b>-0,56</b> | <b>-0,67</b> | -0,34     |                      |                           |                       |                |                 |              |                       |
| soil humus content     | <b>0,79</b>                    | <b>-0,57</b>     | <b>0,65</b>                   | <b>0,64</b>         | <b>0,59</b> | 0,08        | 0,44         | 0,34         | <b>0,54</b>   | <b>0,62</b> | 0,39         | 0,44         | 0,37      | -0,49                |                           |                       |                |                 |              |                       |
| soil nutrients         | 0,38                           | -0,15            | <b>0,50</b>                   | 0,32                | 0,17        | 0,16        | 0,37         | 0,34         | 0,07          | 0,08        | 0,21         | 0,16         | 0,30      | 0,17                 | <b>0,51</b>               |                       |                |                 |              |                       |
| soil pH                | -0,05                          | 0,05             | 0,17                          | -0,06               | -0,02       | 0,02        | 0,08         | 0,09         | -0,23         | -0,19       | -0,07        | -0,14        | 0,08      | <b>0,50</b>          | 0,13                      | <b>0,76</b>           |                |                 |              |                       |
| soil moisture          | 0,13                           | -0,23            | 0,30                          | 0,14                | 0,05        | 0,06        | 0,05         | 0,08         | 0,00          | -0,02       | 0,18         | 0,17         | 0,01      | 0,29                 | 0,33                      | <b>0,79</b>           | <b>0,80</b>    |                 |              |                       |
| light                  | -0,20                          | 0,17             | 0,08                          | -0,24               | -0,07       | -0,08       | -0,06        | -0,07        | -0,29         | -0,30       | -0,19        | -0,30        | -0,04     | <b>0,72</b>          | -0,05                     | <b>0,67</b>           | <b>0,81</b>    | <b>0,77</b>     |              |                       |
| continentality         | 0,00                           | 0,16             | 0,18                          | -0,04               | -0,09       | 0,03        | 0,08         | 0,13         | -0,01         | -0,01       | -0,01        | -0,10        | 0,07      | <b>0,61</b>          | 0,17                      | <b>0,69</b>           | <b>0,65</b>    | <b>0,64</b>     | <b>0,77</b>  |                       |
| temperature            | <b>0,71</b>                    | <b>-0,56</b>     | <b>0,70</b>                   | <b>0,71</b>         | 0,40        | 0,24        | 0,41         | 0,44         | 0,37          | <b>0,53</b> | <b>0,56</b>  | <b>0,64</b>  | 0,34      | -0,32                | <b>0,81</b>               | <b>0,70</b>           | 0,45           | <b>0,65</b>     | 0,22         | 0,43                  |
|                        | <i>time since deglaciation</i> | <i>elevation</i> | <i>number vascular plants</i> | <i>ground cover</i> | <i>Ch</i>   | <i>G</i>    | <i>Hgram</i> | <i>Hherb</i> | <i>lichen</i> | <i>Macp</i> | <i>moss</i>  | <i>NaPh</i>  | <i>Th</i> | <i>soil aeration</i> | <i>soil humus content</i> | <i>soil nutrients</i> | <i>soil pH</i> | <i>moisture</i> | <i>light</i> | <i>continentality</i> |
